# Supplementary material for: Structure of the flavonoid catechin in solution: NMR and quantum chemical investigations
Source: Royal Society of Chemistry journal article supplement (doi:10.1039/d0nj03251d), 2020-01-01
Supplement: d0nj03251d1.pdf [file d0nj03251d1.pdf]

## **Structure of the Flavonoid Catechin in Solution: NMR and Quantum Chemical Investigation**

Haroldo C. Da Silva<sup>a</sup>, Anna Nydia R. Da Silva<sup>a</sup>, Theo L. S. Da Rocha<sup>a</sup>, Isabel S. Hernandez<sup>a</sup>, Hélio F. Dos Santos<sup>b</sup>, Wagner B. De Almeida<sup>a,\*</sup>

<sup>a</sup>Laboratório de Química Computacional e Modelagem Molecular (LQC-MM), Departamento de Química Inorgânica, Instituto de Química, Universidade Federal Fluminense (UFF), Outeiro de São João Batista s/n, Campus do Valonguinho, 24020-141, Centro, Niterói, RJ, Brazil.

<sup>b</sup>Núcleo de Estudos em Química Computacional (NEQC), Departamento de Química, ICE, Universidade Federal de Juiz de Fora (UFJF), Campus Universitário, Martelos, Juiz de Fora, MG, 36036-330, Brazil.

### **SUPPLEMENTARY MATERIAL**

**Methods:** Molecular dynamics (MD) simulation was performed for catechin in aqueous solution. The solute plus 746 water molecules were placed inside a 30 Å cubic box. The simulation steps included minimizing the system, 100 ps of NVT heating up to 298.15 K, 1 ns of NPT density equilibration and 1 ns of NVT production. The GAFF2 force field with AM1 BCC charges was used for catechin and the TIP3P potential for water. For the MD simulation, we used the program AMBER-16 and the trajectory was analyzed with the CPPTRAJ module.

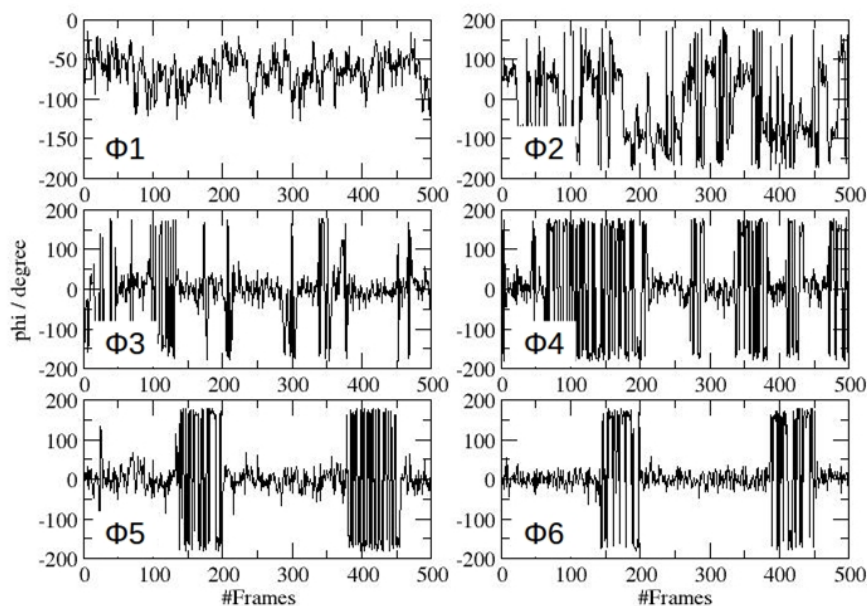

**Figure S1.** Variation of the dihedral angles that define the conformation of catechin in aqueous solution along the MD trajectory.  $\phi_1$ : [C2', C1', C2, O],  $\phi_2$ : [H, O, C3, C2],  $\phi_3$ : [H, O, C5, C6],  $\phi_4$ : [H, O, C7, C8],  $\phi_5$ : [H, O, C3', C2'],  $\phi_6$ : [H, O, C4', C3'].

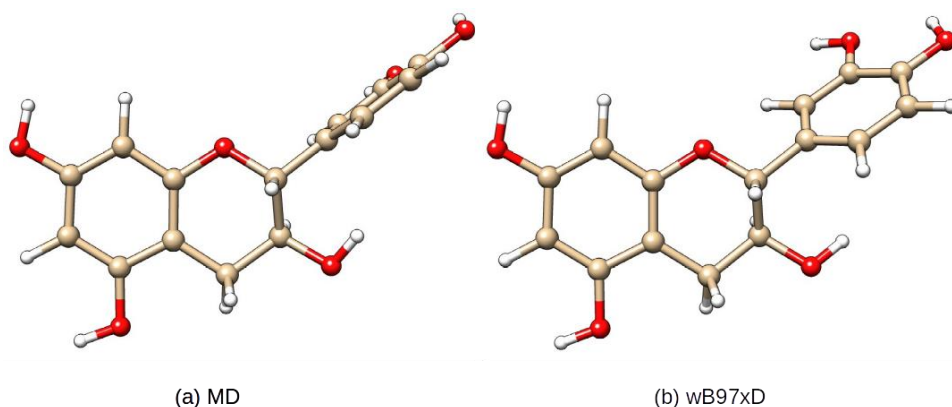

**Figure S2.** Catechin conformation obtained from the MD simulation (a) and optimized at wB97xD/6-31G(d,p)-PCM level (b). The MD geometry was used as starting point for the DFT geometry optimization (total energy: -1031.0827695 a.u.). The conformational difference is represented by the set of didedrals  $\phi_1$ : [C2', C1', C2, O],  $\phi_2$ : [H, O, C3, C2],  $\phi_3$ : [H, O, C5, C6],  $\phi_4$ : [H, O, C7, C8],  $\phi_5$ : [H, O, C3', C2'],  $\phi_6$ : [H, O, C4', C3'] found equal to [-66, -23, -13, 6, 0.4, 13] (MD - a) and [-39, -62, 1, 0.9, 0.5, 0.1] (DFT - b).

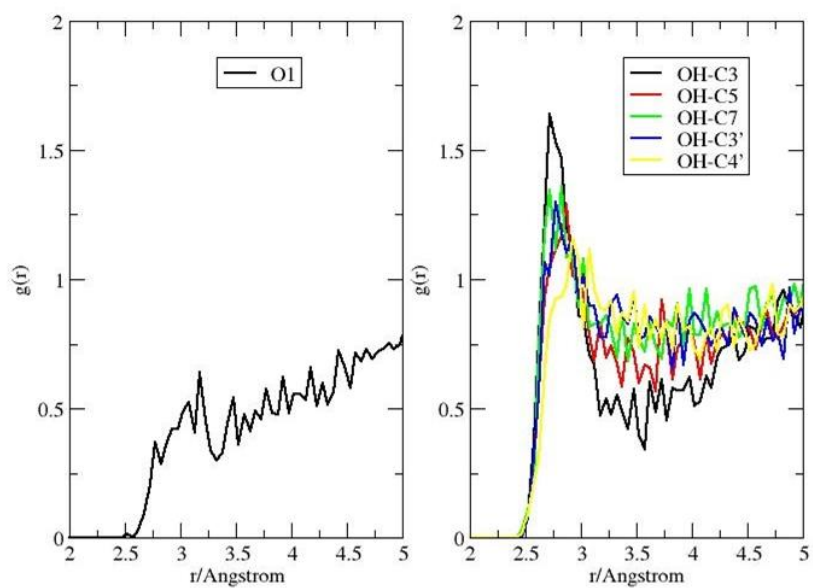

**Figure S3.** Radial distribution function (RDF) calculated for O-Ow pair of atoms in the catechin molecule.

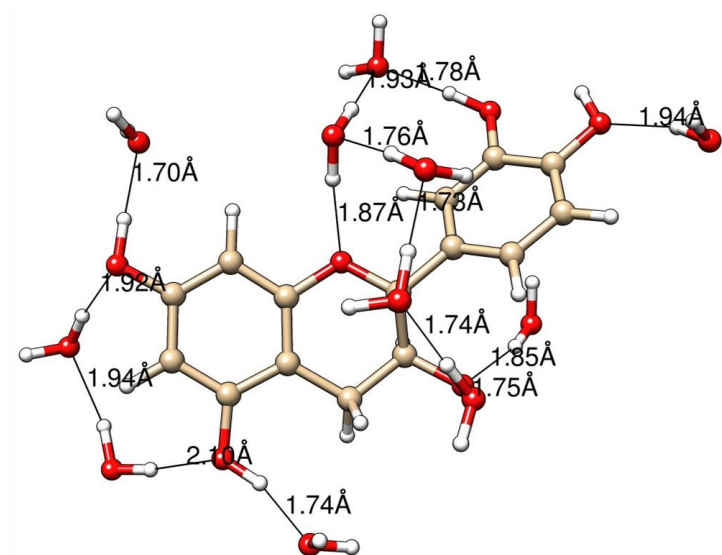

**Figure S4.** wB97xD/6-31G(d,p)-PCM optimized geometry for the cluster of catechin with 11 water molecules (total energy: -1871.7130978 a.u.). The catechin conformer is characterized by the dihedral angles [-22, 56, -161, 3, 39, 5] (values in degrees).

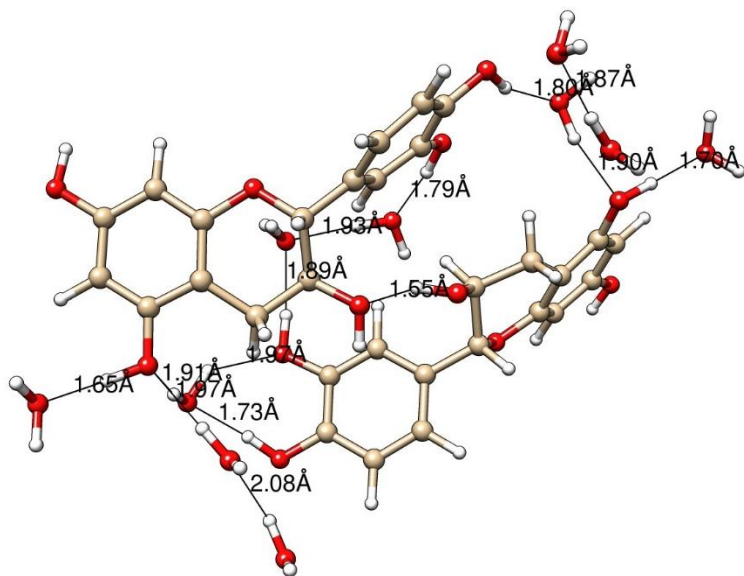

**Figure S5.** Catechin structures obtained from the solid-state experimental data. The dimer with 10 H<sub>2</sub>O molecules with H-position and water arrangements optimized: [-79, 168, -21, 4, -13, -23]...[-79, -97, -12, 6, -9, -29]. The values inset are the O-H...O distances.

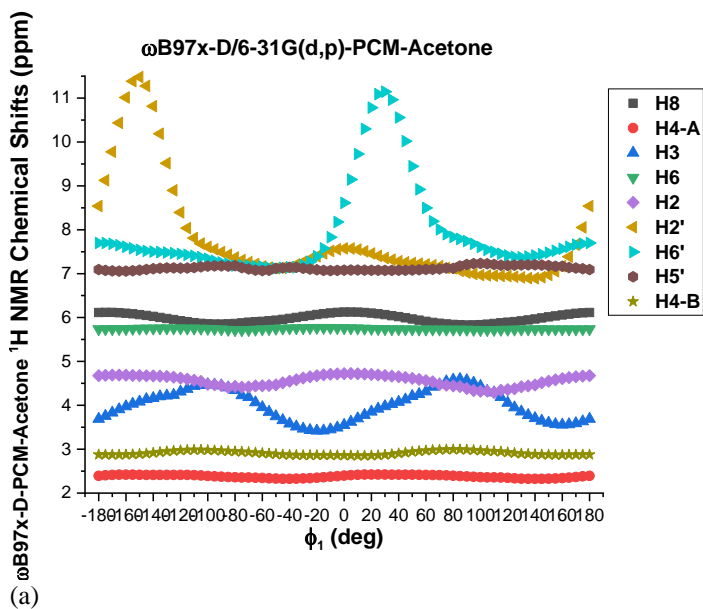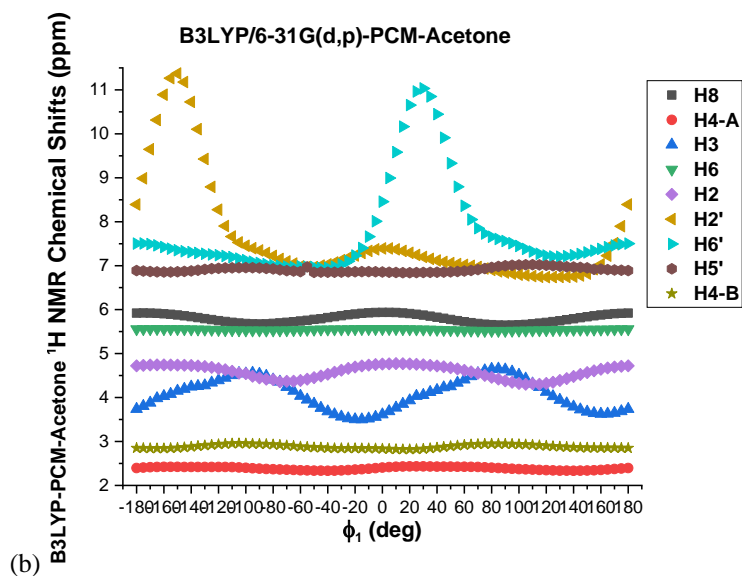

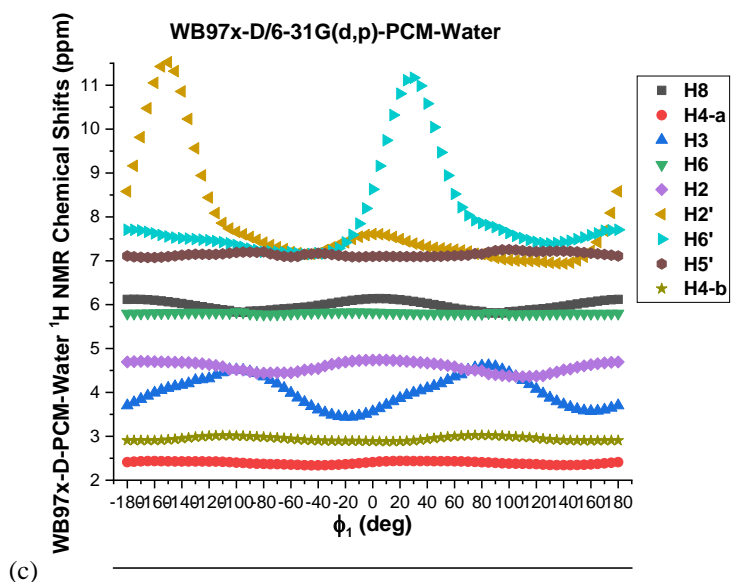

(c)

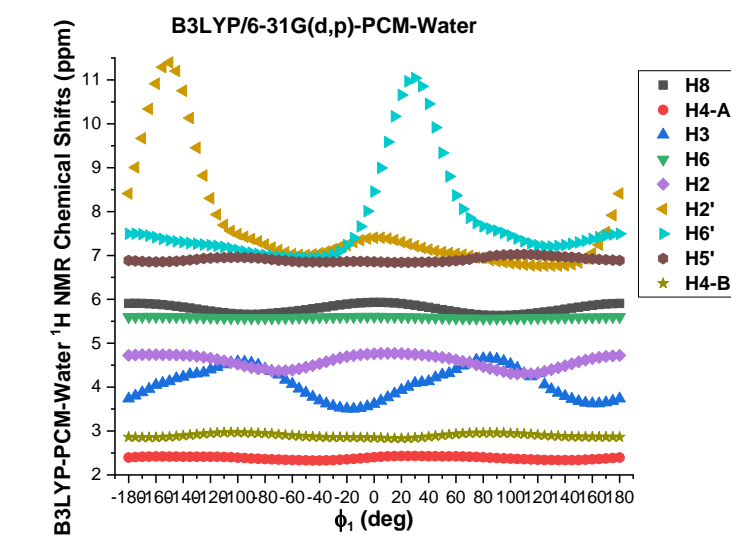

(d)

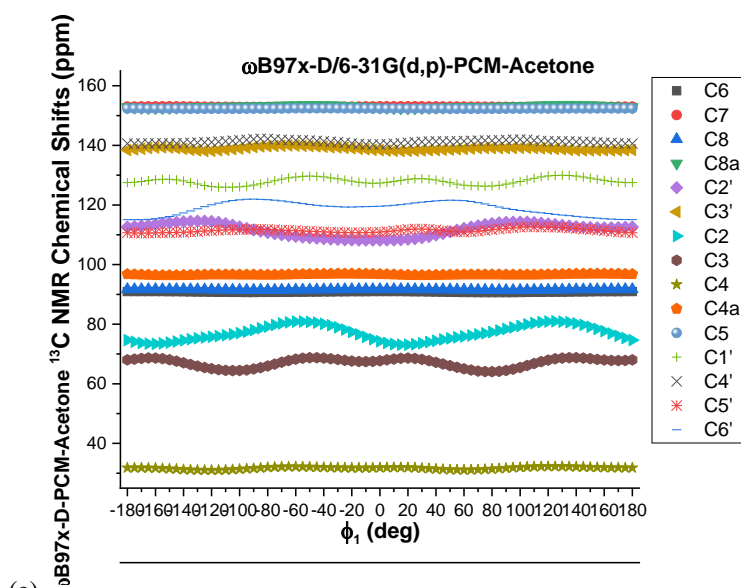

(e)

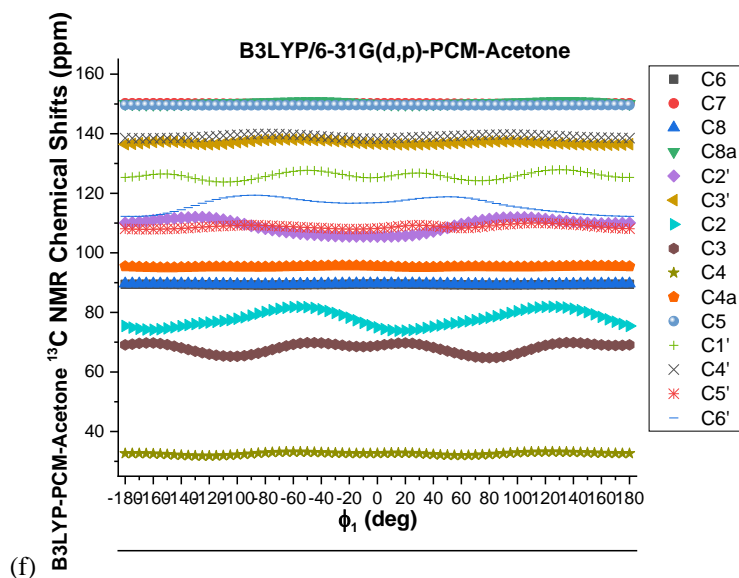

**Figure S6.** DFT-PCM NMR chemical shifts scan varying the B-ring torsion angle from  $-180^\circ$  do  $180^\circ$  in step size of  $5^\circ$ .

(a,c)  $\omega\text{B97x-d}/6-31\text{G(d,p)}\text{-PCM-Acetone}$  and water  $^1\text{H}$  NMR chemical shifts (b,d) B3LYP/6-31(d,p)-PCM-Acetone and water  $^1\text{H}$  NMR chemical shifts (e)  $\omega\text{B97x-d}/6-31\text{G(d,p)}\text{-PCM-Acetone}$   $^{13}\text{C}$  NMR chemical shifts. (f) B3LYP6-31G(d,p)-PCM-Acetone  $^{13}\text{C}$  NMR chemical shifts.

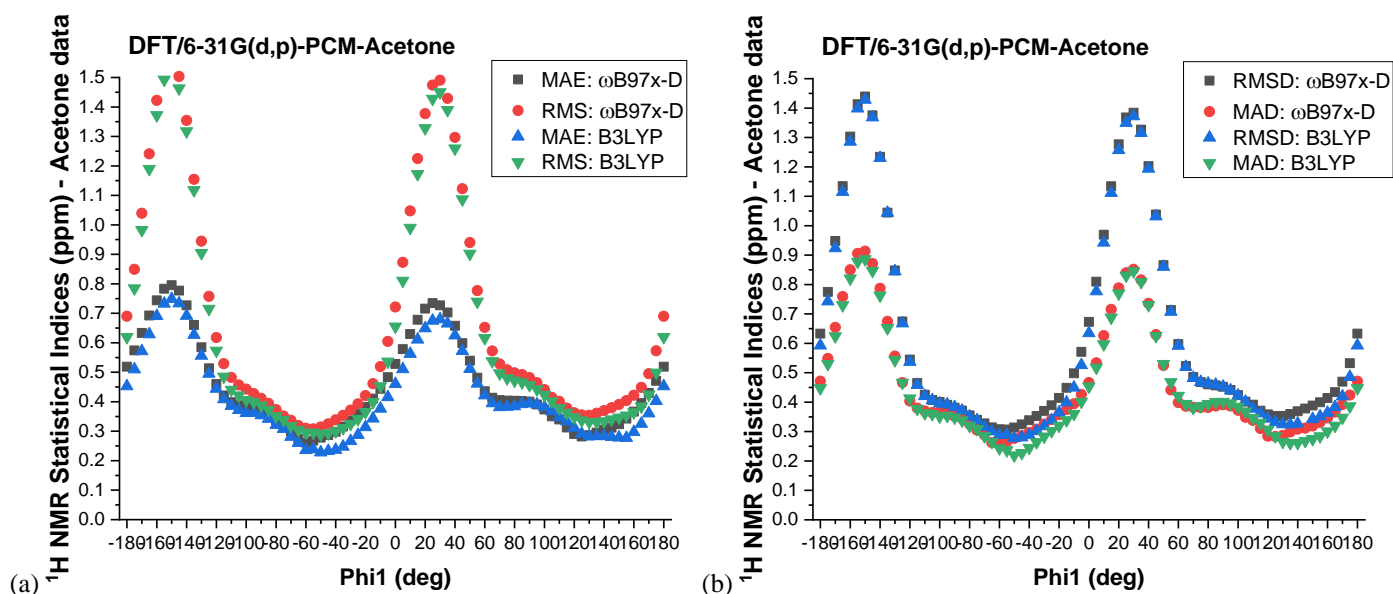

**Figure S7.** DFT-PCM-Acetone  $^1\text{H}$  NMR statistical indices (a) MAE, RMS (b) (RMSD, MAD)

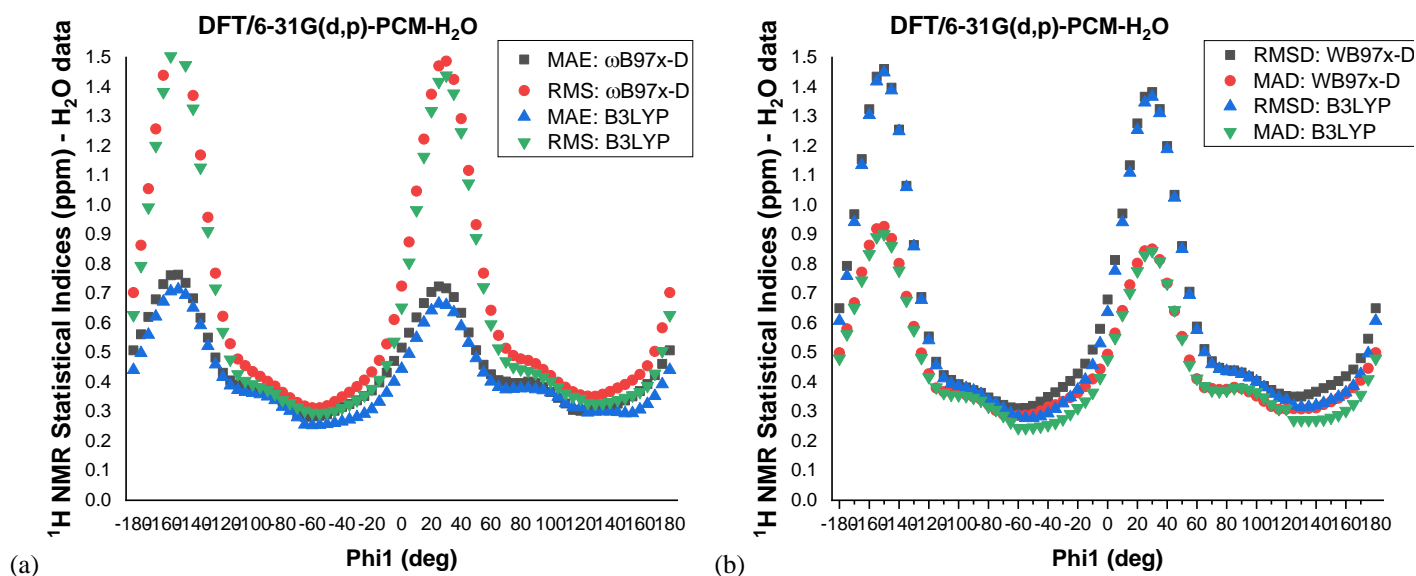

**Figure S8.** DFT-PCM-Water <sup>1</sup>H NMR statistical indices (a) MAE, RMS (b) (RMSD, MAD)

1. RMSD: *Root Mean Square Deviation.*

$$RMSD = \sqrt{\frac{1}{N} \sum_{i=1}^N (\Delta\delta_i - \overline{\Delta\delta})^2}$$

2. MAD: *Root Mean Deviation.*

$$MAD = \frac{1}{N} \sum_{i=1}^N |\Delta\delta_i - \overline{\Delta\delta}|$$

3. MAE: *Mean Absolute Error.*

$$MAE = \frac{1}{N} \sum_{i=1}^N |\Delta\delta_i|$$

4. RMS: *Root Mean Square.*

$$RMS = \sqrt{\frac{1}{N} \sum_{i=1}^N (\Delta\delta_i)^2}$$

- Meaning of variables:

$\Delta\delta$ : Difference between the calculated and experimental chemical shifts ( $\delta_{Theoretical} - \delta_{Experimental}$ ).

$\overline{\Delta\delta}$ : Average of  $\Delta\delta$ .

$N$ : Total number of carbon or hydrogen atoms considered.

$i$ : Index of the  $i$ th C or H atom in the sum.

**Figure S9.** Statistical Indices: RMSD, MAE, MAD and RMS

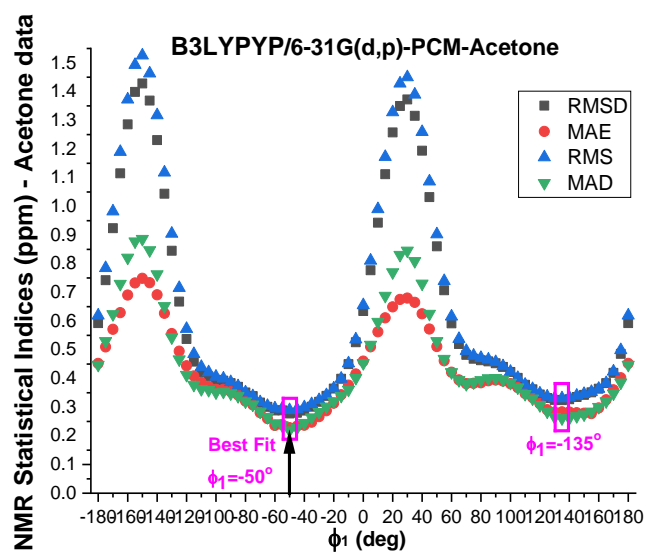

**Figure S10.** B3LYP/6-31(d,p)-PCM-Acetone statistical indices (RMSD, MAE, RMS and MAD) scan varying the B-ring torsion angle from  $-180^\circ$  to  $180^\circ$  in step size of  $5^\circ$ .

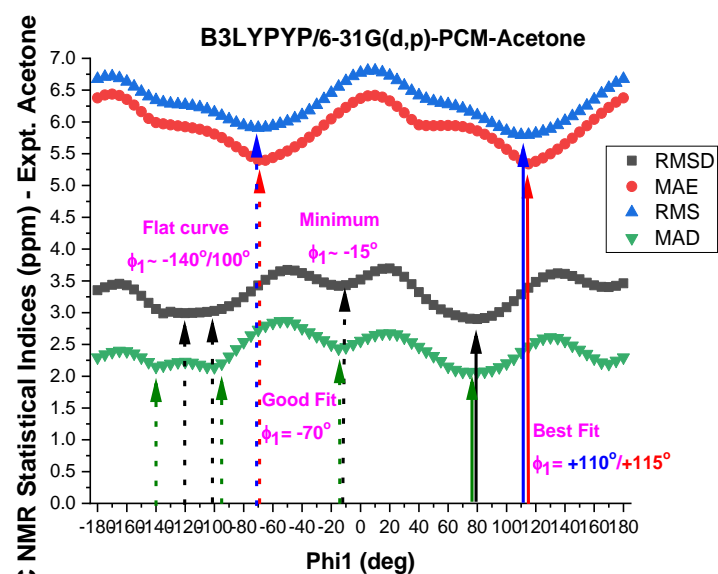

**Figure S11.** B3LYP/6-31G(d,p)-PCM-Acetone  $^{13}\text{C}$  NMR statistical indices for various values of torsion angle  $\phi_1$  of flavonoid catechin (varying from  $-180^\circ$  to  $180^\circ$  in step size of  $5^\circ$ ), using as reference experimental Acetone- $d_6$  data

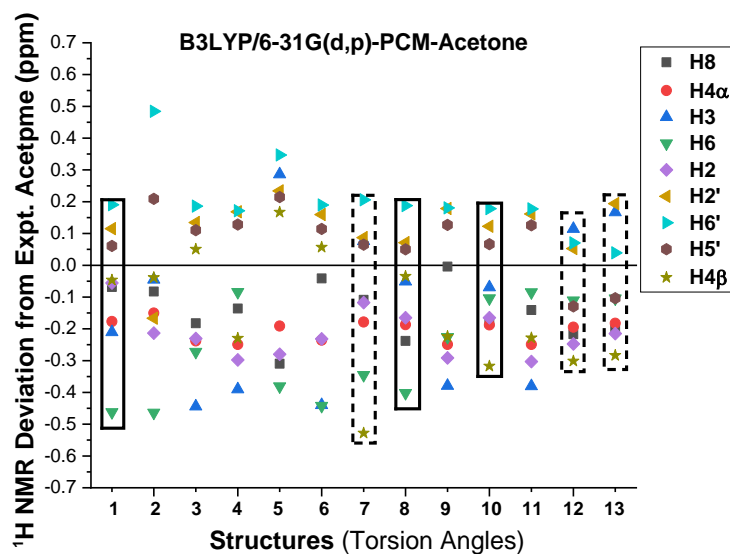

**Figure S12.** B3LYP/6-31(d,p)-PCM-Acetone deviation from experimental chemical shifts for all optimized catechin structures reported in Table 2.



**Table S1.** The RDF first peak position and coordination number (CN). The peak maximum (Max) and minimum (Min) are given.

|        | Max/Å | Min/Å | CN |
|--------|-------|-------|----|
| O1     | 3.2   | 3.3   | 1  |
| OH-C3  | 2.7   | 3.2   | 2  |
| OH-C5  | 2.9   | 3.1   | 2  |
| OH-C7  | 2.8   | 3.1   | 2  |
| OH-C3' | 2.8   | 3.2   | 2  |
| OH-C4' | 2.9   | 3.0   | 2  |

**Table S2.**  $^1\text{H}$  and  $^{13}\text{C}$  NMR shielding constant and chemical shift calculated for catechin in the solid state. The geometry was partially optimized at wB97xD/6-31G(d,p)-PCM (see Figures S5) and the NMR properties calculated at B3LYP/6-31G(d,p)-PCM.

|      | 2Catechin.10H <sub>2</sub> O – X-ray pop. t. |                   | Average $\sigma$ /ppm | Average $\delta$ /ppm |
|------|----------------------------------------------|-------------------|-----------------------|-----------------------|
|      | $\sigma$ /ppm (A)                            | $\sigma$ /ppm (B) |                       |                       |
| C2   | 111.1877                                     | 109.4412          | 110.3145              | 82.32                 |
| C3   | 126.4948                                     | 128.9930          | 127.7439              | 64.89                 |
| C4   | 157.4736                                     | 158.4182          | 157.9459              | 34.69                 |
| C4a  | 92.3285                                      | 92.1919           | 92.2602               | 100.37                |
| C5   | 41.3582                                      | 38.9102           | 40.1342               | 152.50                |
| C6   | 100.6408                                     | 100.7356          | 100.6882              | 91.95                 |
| C7   | 38.6359                                      | 38.5449           | 38.5904               | 154.04                |
| C8   | 97.4361                                      | 99.6798           | 98.5579               | 94.08                 |
| C8a  | 35.3204                                      | 37.5891           | 36.45475              | 156.18                |
| C1'  | 65.3122                                      | 63.5050           | 64.4086               | 128.23                |
| C2'  | 83.0555                                      | 86.4159           | 84.7357               | 107.90                |
| C3'  | 45.7114                                      | 52.0629           | 48.8872               | 143.75                |
| C4'  | 45.7267                                      | 47.8162           | 46.7715               | 145.86                |
| C5'  | 78.2350                                      | 76.7436           | 77.4893               | 115.14                |
| C6'  | 72.0957                                      | 70.2621           | 71.1789               | 121.46                |
| CH2  | 27.3751                                      | 27.6932           | 27.5342               | 4.24                  |
| OH3  | 31.6445                                      | 25.1028           | 28.3737               | 3.40                  |
| CH3  | 27.6235                                      | 27.4186           | 27.5211               | 4.26                  |
| CH4b | 29.6167                                      | 29.8436           | 29.7302               | 2.05                  |
| CH4a | 28.9126                                      | 29.0530           | 28.9828               | 2.79                  |
| OH5  | 20.7762                                      | 21.8079           | 21.2921               | 10.48                 |
| CH6  | 25.6085                                      | 25.5235           | 25.5660               | 6.21                  |
| OH7  | 27.5563                                      | 27.7301           | 27.6432               | 4.13                  |
| CH8  | 25.8639                                      | 26.0814           | 25.9727               | 5.80                  |
| CH2' | 24.1277                                      | 24.5008           | 24.3143               | 7.46                  |
| OH3' | 23.1035                                      | 24.5276           | 23.8156               | 7.96                  |
| OH4' | 22.5570                                      | 22.4888           | 22.5229               | 9.25                  |
| CH5' | 24.3776                                      | 24.3678           | 24.3727               | 7.40                  |
| CH6' | 24.7574                                      | 24.7350           | 24.7462               | 7.03                  |

**Table S3.**  $^1\text{H}$  and  $^{13}\text{C}$  NMR shielding constant and chemical shift calculated for catechin in aqueous solution. The geometry was optimized at wB97xD/6-31G(d,p)-PCM (see Figures S4) and the NMR properties calculated at B3LYP/6-31G(d,p)-PCM.

|      | Catechin.11H <sub>2</sub> O (Fig. S4) |                     |
|------|---------------------------------------|---------------------|
|      | $\sigma/\text{ppm}$                   | $\delta/\text{ppm}$ |
| C2   | 114.3693                              | 78.26               |
| C3   | 125.2743                              | 67.36               |
| C4   | 158.5741                              | 34.06               |
| C4a  | 95.9273                               | 96.71               |
| C5   | 42.0515                               | 150.58              |
| C6   | 97.7084                               | 94.93               |
| C7   | 42.5860                               | 150.05              |
| C8   | 102.6768                              | 89.96               |
| C8a  | 43.7964                               | 148.84              |
| C1'  | 64.8903                               | 127.74              |
| C2'  | 81.2244                               | 111.41              |
| C3'  | 54.4771                               | 138.16              |
| C4'  | 52.7370                               | 139.90              |
| C5'  | 82.6528                               | 109.98              |
| C6'  | 75.5699                               | 117.06              |
| CH2  | 26.6083                               | 5.17                |
| OH3  | 25.2185                               | 6.56                |
| CH3  | 28.3035                               | 3.47                |
| CH4b | 29.2939                               | 2.48                |
| CH4a | 29.0719                               | 2.70                |
| OH5  | 22.5535                               | 9.22                |
| CH6  | 25.5513                               | 6.23                |
| OH7  | 21.9683                               | 9.81                |
| CH8  | 25.3200                               | 6.46                |
| CH2' | 24.5285                               | 7.25                |
| OH3' | 23.6736                               | 8.10                |
| OH4' | 25.9091                               | 5.87                |
| CH5' | 24.2365                               | 7.54                |
| CH6' | 24.6075                               | 7.17                |

## OPTIMIZED CARTESIAN COORDINATES (Singlet State)

### M1- Structure

$\omega$ B97x-D/6-31G(d,p)-PCM-Acetone fully optimized XYZ coordinates

| Atomic Number | X         | Y         | Z         |
|---------------|-----------|-----------|-----------|
| 6             | 0.332208  | 0.608693  | -0.598393 |
| 6             | -1.762720 | -0.507279 | -0.280127 |
| 6             | -2.380342 | 0.692045  | 0.077294  |
| 6             | -1.579770 | 1.948172  | 0.278738  |
| 6             | -0.108364 | 1.610646  | 0.473261  |
| 1             | -1.972317 | -2.604528 | -0.719093 |
| 6             | -2.480043 | -1.691907 | -0.438645 |
| 6             | -3.765395 | 0.668141  | 0.269017  |
| 1             | -1.660759 | 2.614666  | -0.587647 |
| 1             | 0.040601  | 1.130019  | 1.451676  |
| 6             | -4.511504 | -0.497605 | 0.119185  |
| 6             | -3.854144 | -1.677583 | -0.233692 |
| 1             | -5.585853 | -0.485854 | 0.277114  |
| 8             | -0.418012 | -0.601452 | -0.472229 |
| 1             | 0.133080  | 1.056470  | -1.580985 |
| 6             | 1.789737  | 0.250362  | -0.489716 |
| 6             | 2.213736  | -0.637261 | 0.504174  |
| 6             | 2.729414  | 0.836137  | -1.328573 |
| 6             | 3.559630  | -0.926229 | 0.646377  |
| 1             | 1.486156  | -1.107010 | 1.158703  |
| 6             | 4.086522  | 0.550428  | -1.184032 |
| 1             | 2.404576  | 1.526619  | -2.098748 |
| 6             | 4.507756  | -0.329862 | -0.199423 |
| 1             | 4.826860  | 0.999594  | -1.835336 |
| 8             | 0.712592  | 2.748702  | 0.334051  |
| 1             | 0.399926  | 3.408294  | 0.959945  |
| 8             | -4.342430 | 1.846997  | 0.615189  |
| 1             | -5.286191 | 1.716467  | 0.747382  |
| 8             | -4.518528 | -2.850051 | -0.394894 |
| 1             | -5.459371 | -2.710079 | -0.251758 |
| 8             | 5.825272  | -0.618734 | -0.051787 |
| 1             | 5.906468  | -1.248200 | 0.675709  |
| 8             | 4.077569  | -1.779977 | 1.575281  |
| 1             | 3.375462  | -2.142818 | 2.122946  |
| 1             | -1.960659 | 2.501085  | 1.142529  |

### M2- Structure

$\omega$ B97x-D/6-31G(d,p)-PCM-Acetone fully optimized XYZ coordinates

| Atomic Number | X         | Y         | Z         |
|---------------|-----------|-----------|-----------|
| 6             | -0.328975 | 0.372241  | 0.332910  |
| 6             | 1.847348  | -0.572786 | 0.088972  |
| 6             | 2.414057  | 0.697846  | -0.025818 |
| 6             | 1.553192  | 1.924272  | -0.160773 |
| 6             | 0.128991  | 1.541557  | -0.542947 |
| 1             | 2.152136  | -2.694098 | 0.290384  |
| 6             | 2.623777  | -1.724875 | 0.199040  |
| 6             | 3.810092  | 0.779973  | -0.018829 |
| 1             | 1.507794  | 2.473060  | 0.787710  |
| 1             | 0.096215  | 1.196475  | -1.587373 |
| 6             | 4.615087  | -0.350901 | 0.092249  |
| 6             | 4.007801  | -1.603607 | 0.194561  |
| 1             | 5.696401  | -0.255478 | 0.093334  |

|   |           |           |           |
|---|-----------|-----------|-----------|
| 8 | 0.498722  | -0.765147 | 0.079535  |
| 1 | -0.216282 | 0.671674  | 1.383564  |
| 6 | -1.752970 | -0.035661 | 0.068922  |
| 6 | -2.750054 | 0.272492  | 0.995152  |
| 6 | -2.094836 | -0.685632 | -1.113541 |
| 6 | -4.069368 | -0.063326 | 0.735963  |
| 1 | -2.496644 | 0.775329  | 1.923711  |
| 6 | -3.419831 | -1.023492 | -1.376920 |
| 1 | -1.320089 | -0.937085 | -1.828816 |
| 6 | -4.412476 | -0.712344 | -0.458019 |
| 1 | -3.698838 | -1.529762 | -2.293540 |
| 8 | -0.774977 | 2.602353  | -0.327355 |
| 1 | -0.451728 | 3.362401  | -0.819288 |
| 8 | 4.339022  | 2.025065  | -0.129269 |
| 1 | 5.299131  | 1.965818  | -0.144605 |
| 8 | 4.732361  | -2.746205 | 0.300902  |
| 1 | 5.670723  | -2.535897 | 0.277524  |
| 8 | -5.706292 | -1.036157 | -0.708057 |
| 1 | -6.231988 | -0.738933 | 0.045407  |
| 8 | -5.114605 | 0.184594  | 1.576319  |
| 1 | -4.808094 | 0.628171  | 2.372521  |
| 1 | 1.976417  | 2.607756  | -0.902672 |

### M3- Structure

$\omega$ B97x-D/6-31G(d,p)-PCM-Acetone fully optimized XYZ coordinates

| Atomic Number | X         | Y         | Z         |
|---------------|-----------|-----------|-----------|
| 6             | -0.312656 | -0.557403 | -0.595534 |
| 6             | 1.783679  | 0.516615  | -0.255882 |
| 6             | 2.373277  | -0.695540 | 0.099640  |
| 6             | 1.554491  | -1.939536 | 0.315345  |
| 6             | 0.090061  | -1.581997 | 0.479025  |
| 1             | 2.028155  | 2.601421  | -0.708350 |
| 6             | 2.530396  | 1.683958  | -0.426035 |
| 6             | 3.762923  | -0.703283 | 0.279160  |
| 1             | 1.642053  | -2.622187 | -0.537636 |
| 1             | -0.075375 | -1.108612 | 1.458187  |
| 6             | 4.535817  | 0.440607  | 0.118338  |
| 6             | 3.905763  | 1.634864  | -0.233102 |
| 1             | 5.610347  | 0.417688  | 0.262193  |
| 8             | 0.439871  | 0.645003  | -0.442845 |
| 1             | -0.097947 | -0.998535 | -1.577884 |
| 6             | -1.774151 | -0.211884 | -0.498970 |
| 6             | -2.214256 | 0.696374  | 0.471076  |
| 6             | -2.707685 | -0.862480 | -1.299046 |
| 6             | -3.565941 | 0.951293  | 0.617701  |
| 1             | -1.493206 | 1.208566  | 1.099979  |
| 6             | -4.071869 | -0.611209 | -1.146957 |
| 1             | -2.372369 | -1.569560 | -2.049783 |
| 6             | -4.506644 | 0.296969  | -0.195481 |
| 1             | -4.805368 | -1.109221 | -1.769230 |
| 8             | -0.663365 | -2.764659 | 0.346073  |
| 1             | -1.593537 | -2.527790 | 0.430847  |
| 8             | 4.312787  | -1.895008 | 0.625854  |
| 1             | 5.261295  | -1.786383 | 0.745423  |
| 8             | 4.696440  | 2.727391  | -0.381522 |
| 1             | 4.149030  | 3.483754  | -0.609014 |
| 8             | -5.828371 | 0.556070  | -0.045409 |
| 1             | -5.920966 | 1.216097  | 0.652955  |
| 8             | -4.100030 | 1.819667  | 1.520853  |
| 1             | -3.405996 | 2.223775  | 2.049840  |
| 1             | 1.915986  | -2.480818 | 1.192773  |

## M4- Structure

$\omega$ B97x-D/6-31G(d,p)-PCM-Acetone fully optimized XYZ coordinates

| Atomic Number | X         | Y         | Z         |
|---------------|-----------|-----------|-----------|
| 6             | 0.293494  | 0.519948  | -0.490815 |
| 6             | -1.789603 | -0.546130 | -0.143098 |
| 6             | -2.390471 | 0.682702  | 0.137955  |
| 6             | -1.568856 | 1.921812  | 0.392377  |
| 6             | -0.097245 | 1.578459  | 0.553649  |
| 1             | -2.015758 | -2.641019 | -0.539196 |
| 6             | -2.530303 | -1.712570 | -0.322718 |
| 6             | -3.792185 | 0.709324  | 0.192616  |
| 1             | -1.648203 | 2.630583  | -0.441278 |
| 1             | 0.081005  | 1.135278  | 1.543729  |
| 6             | -4.559057 | -0.435618 | 0.013138  |
| 6             | -3.917548 | -1.646776 | -0.235406 |
| 1             | -5.638305 | -0.381047 | 0.066647  |
| 8             | -0.436348 | -0.679101 | -0.246410 |
| 1             | 0.031819  | 0.911805  | -1.482792 |
| 6             | 1.762997  | 0.203408  | -0.441249 |
| 6             | 2.255717  | -0.729577 | 0.477760  |
| 6             | 2.653527  | 0.903273  | -1.250015 |
| 6             | 3.617145  | -0.964020 | 0.561314  |
| 1             | 1.569440  | -1.282955 | 1.110267  |
| 6             | 4.026394  | 0.674289  | -1.158814 |
| 1             | 2.276957  | 1.627841  | -1.963786 |
| 6             | 4.513632  | -0.260353 | -0.259632 |
| 1             | 4.725598  | 1.210732  | -1.788404 |
| 8             | 0.637019  | 2.766506  | 0.379816  |
| 1             | 1.571521  | 2.548779  | 0.471368  |
| 8             | -4.469230 | 1.860690  | 0.433162  |
| 1             | -3.857375 | 2.600435  | 0.495805  |
| 8             | -4.703266 | -2.740222 | -0.402136 |
| 1             | -4.149218 | -3.508683 | -0.568812 |
| 8             | 5.844398  | -0.500894 | -0.172146 |
| 1             | 5.975789  | -1.186159 | 0.495176  |
| 8             | 4.201043  | -1.856266 | 1.408149  |
| 1             | 3.534155  | -2.300039 | 1.940112  |
| 1             | -1.912179 | 2.439739  | 1.295300  |

## M5- Structure

$\omega$ B97x-D/6-31G(d,p)-PCM-Acetone fully optimized XYZ coordinates

| Atomic Number | X         | Y         | Z         |
|---------------|-----------|-----------|-----------|
| 6             | 0.305713  | 0.398644  | -0.711477 |
| 6             | -1.819894 | -0.562165 | -0.168700 |
| 6             | -2.392728 | 0.703761  | -0.042306 |
| 6             | -1.550430 | 1.946526  | -0.100409 |
| 6             | -0.089068 | 1.603927  | 0.146568  |
| 1             | -2.104737 | -2.695219 | -0.197472 |
| 6             | -2.577840 | -1.729160 | -0.091134 |
| 6             | -3.773613 | 0.764794  | 0.168313  |
| 1             | -1.620362 | 2.428299  | -1.081980 |
| 1             | 0.059096  | 1.320479  | 1.198966  |
| 6             | -4.559420 | -0.380991 | 0.252465  |
| 6             | -3.947115 | -1.628415 | 0.121917  |
| 1             | -5.629507 | -0.300980 | 0.417720  |
| 8             | -0.482238 | -0.738311 | -0.352193 |
| 1             | 0.112512  | 0.655208  | -1.761068 |

|   |           |           |           |
|---|-----------|-----------|-----------|
| 6 | 1.751094  | 0.019779  | -0.537901 |
| 6 | 2.314688  | 0.007082  | 0.741693  |
| 6 | 2.549625  | -0.257477 | -1.639987 |
| 6 | 3.658248  | -0.281147 | 0.902931  |
| 1 | 1.697518  | 0.217029  | 1.609362  |
| 6 | 3.904881  | -0.544020 | -1.480273 |
| 1 | 2.115068  | -0.244591 | -2.632858 |
| 6 | 4.463990  | -0.559153 | -0.212088 |
| 1 | 4.535891  | -0.765501 | -2.332395 |
| 8 | 0.765139  | 2.664032  | -0.220864 |
| 1 | 1.664475  | 2.391870  | -0.017109 |
| 8 | -4.306684 | 2.006690  | 0.290471  |
| 1 | -5.251047 | 1.934460  | 0.457745  |
| 8 | -4.651188 | -2.786109 | 0.193491  |
| 1 | -4.050453 | -3.533752 | 0.121141  |
| 8 | 5.779707  | -0.842874 | -0.042362 |
| 1 | 5.965935  | -0.806332 | 0.904223  |
| 8 | 4.305415  | -0.324802 | 2.101741  |
| 1 | 3.697262  | -0.115039 | 2.816302  |
| 1 | -1.901638 | 2.673152  | 0.637473  |

## M6- Structure

$\omega$ B97x-D/6-31G(d,p)-PCM-Acetone fully optimized XYZ coordinates

| Atomic Number | X         | Y         | Z         |
|---------------|-----------|-----------|-----------|
| 6             | 0.315039  | 0.554225  | -0.587180 |
| 6             | -1.779323 | -0.522474 | -0.248384 |
| 6             | -2.370014 | 0.692230  | 0.104293  |
| 6             | -1.552347 | 1.936570  | 0.322781  |
| 6             | -0.086624 | 1.582171  | 0.484641  |
| 1             | -2.034344 | -2.610367 | -0.703060 |
| 6             | -2.523819 | -1.687552 | -0.423824 |
| 6             | -3.758290 | 0.701223  | 0.274622  |
| 1             | -1.641793 | 2.620430  | -0.529109 |
| 1             | 0.082395  | 1.111334  | 1.464472  |
| 6             | -4.531727 | -0.444239 | 0.106888  |
| 6             | -3.900429 | -1.639158 | -0.241938 |
| 1             | -5.607581 | -0.404001 | 0.247654  |
| 8             | -0.433374 | -0.648589 | -0.423078 |
| 1             | 0.095020  | 0.989969  | -1.570725 |
| 6             | 1.777394  | 0.211626  | -0.494425 |
| 6             | 2.220436  | -0.697830 | 0.473065  |
| 6             | 2.708569  | 0.863789  | -1.296347 |
| 6             | 3.572371  | -0.953934 | 0.614298  |
| 1             | 1.501215  | -1.211145 | 1.103271  |
| 6             | 4.073140  | 0.611224  | -1.149684 |
| 1             | 2.371290  | 1.571471  | -2.045702 |
| 6             | 4.510617  | -0.298906 | -0.201179 |
| 1             | 4.804625  | 1.109626  | -1.774117 |
| 8             | 0.663719  | 2.766108  | 0.346595  |
| 1             | 1.594830  | 2.530915  | 0.427303  |
| 8             | -4.310748 | 1.891840  | 0.619960  |
| 1             | -5.259406 | 1.784079  | 0.737148  |
| 8             | -4.592422 | -2.792543 | -0.422940 |
| 1             | -5.531136 | -2.629797 | -0.290025 |
| 8             | 5.832551  | -0.559647 | -0.056494 |
| 1             | 5.926978  | -1.222667 | 0.638921  |
| 8             | 4.108644  | -1.824409 | 1.514109  |
| 1             | 3.415618  | -2.231853 | 2.041993  |
| 1             | -1.914633 | 2.476156  | 1.200997  |

## M7- Structure

$\omega$ B97x-D/6-31G(d,p)-PCM-Acetone fully optimized XYZ coordinates

| Atomic Number | X         | Y         | Z         |
|---------------|-----------|-----------|-----------|
| 6             | 0.319162  | 0.561200  | -0.632663 |
| 6             | -1.783822 | -0.527108 | -0.273483 |
| 6             | -2.386859 | 0.685127  | 0.063441  |
| 6             | -1.574318 | 1.938820  | 0.222617  |
| 6             | -0.105609 | 1.593147  | 0.415886  |
| 1             | -2.017714 | -2.630087 | -0.666749 |
| 6             | -2.513872 | -1.707520 | -0.400098 |
| 6             | -3.769144 | 0.677318  | 0.273572  |
| 1             | -1.654126 | 2.579059  | -0.662935 |
| 1             | 0.047568  | 1.138023  | 1.405449  |
| 6             | -4.527564 | -0.483969 | 0.156902  |
| 6             | -3.885500 | -1.676353 | -0.180741 |
| 1             | -5.599518 | -0.458140 | 0.327321  |
| 8             | -0.442054 | -0.638322 | -0.476735 |
| 1             | 0.121597  | 0.988317  | -1.624295 |
| 6             | 1.772878  | 0.191938  | -0.517989 |
| 6             | 2.226158  | -0.492654 | 0.613837  |
| 6             | 2.682439  | 0.577459  | -1.494303 |
| 6             | 3.571783  | -0.782047 | 0.754441  |
| 1             | 1.522229  | -0.802841 | 1.379405  |
| 6             | 4.039651  | 0.290655  | -1.352690 |
| 1             | 2.333187  | 1.111286  | -2.370573 |
| 6             | 4.489653  | -0.389961 | -0.232250 |
| 1             | 4.757040  | 0.583161  | -2.109745 |
| 8             | 0.723688  | 2.719891  | 0.239213  |
| 1             | 0.414470  | 3.401414  | 0.842791  |
| 8             | -4.331851 | 1.867524  | 0.602454  |
| 1             | -3.650224 | 2.545214  | 0.636236  |
| 8             | -4.561904 | -2.845331 | -0.311372 |
| 1             | -5.500537 | -2.692458 | -0.167555 |
| 8             | 5.806532  | -0.680976 | -0.085433 |
| 1             | 5.908797  | -1.155651 | 0.748992  |
| 8             | 4.117533  | -1.446579 | 1.812000  |
| 1             | 3.435400  | -1.674003 | 2.450295  |
| 1             | -1.943930 | 2.520730  | 1.071481  |

## M8- Structure

$\omega$ B97x-D/6-31G(d,p)-PCM-Acetone fully optimized XYZ coordinates

| Atomic Number | X         | Y         | Z         |
|---------------|-----------|-----------|-----------|
| 6             | 0.319492  | 0.568950  | -0.633808 |
| 6             | -1.783004 | -0.518582 | -0.269456 |
| 6             | -2.386765 | 0.695077  | 0.060983  |
| 6             | -1.574926 | 1.950015  | 0.213803  |
| 6             | -0.106082 | 1.606137  | 0.409231  |
| 1             | -2.015686 | -2.623710 | -0.651785 |
| 6             | -2.512398 | -1.700026 | -0.390079 |
| 6             | -3.769097 | 0.687633  | 0.270817  |
| 1             | -1.654856 | 2.585577  | -0.675101 |
| 1             | 0.047093  | 1.156270  | 1.401196  |
| 6             | -4.526873 | -0.474649 | 0.160031  |
| 6             | -3.884096 | -1.668441 | -0.171221 |
| 1             | -5.598883 | -0.448499 | 0.330053  |
| 8             | -0.441127 | -0.630145 | -0.471799 |
| 1             | 0.121944  | 0.990775  | -1.627706 |
| 6             | 1.773375  | 0.201064  | -0.516854 |



|   |           |           |           |
|---|-----------|-----------|-----------|
| 6 | 2.226740  | -0.477365 | 0.618644  |
| 6 | 2.682972  | 0.581960  | -1.494948 |
| 6 | 3.572483  | -0.765306 | 0.761085  |
| 1 | 1.522787  | -0.783921 | 1.385652  |
| 6 | 4.040301  | 0.296621  | -1.351508 |
| 1 | 2.333653  | 1.111016  | -2.374080 |
| 6 | 4.490387  | -0.377894 | -0.227419 |
| 1 | 4.757721  | 0.585547  | -2.109908 |
| 8 | 0.722662  | 2.732381  | 0.226875  |
| 1 | 0.412936  | 3.416885  | 0.826809  |
| 8 | -4.332514 | 1.879243  | 0.593338  |
| 1 | -5.275128 | 1.757943  | 0.740932  |
| 8 | -4.559849 | -2.838444 | -0.295906 |
| 1 | -3.946493 | -3.541712 | -0.528918 |
| 8 | 5.807384  | -0.667439 | -0.078763 |
| 1 | 5.909695  | -1.137694 | 0.758154  |
| 8 | 4.118326  | -1.424013 | 1.822234  |
| 1 | 3.436156  | -1.648461 | 2.461543  |
| 1 | -1.945054 | 2.536157  | 1.059525  |

## M9- Structure

$\omega$ B97x-D/6-31G(d,p)-PCM-Acetone fully optimized XYZ coordinates

| Atomic Number | X         | Y         | Z         |
|---------------|-----------|-----------|-----------|
| 6             | 0.299243  | 0.520850  | -0.509154 |
| 6             | -1.786621 | -0.546423 | -0.164070 |
| 6             | -2.384332 | 0.682759  | 0.133556  |
| 6             | -1.559376 | 1.919352  | 0.389365  |
| 6             | -0.088703 | 1.570804  | 0.544348  |
| 1             | -2.032349 | -2.642187 | -0.574577 |
| 6             | -2.528561 | -1.709356 | -0.344870 |
| 6             | -3.782884 | 0.708938  | 0.206059  |
| 1             | -1.639205 | 2.631175  | -0.441839 |
| 1             | 0.090040  | 1.118407  | 1.530265  |
| 6             | -4.552654 | -0.436910 | 0.028683  |
| 6             | -3.914223 | -1.645990 | -0.238217 |
| 1             | -5.631496 | -0.366637 | 0.100854  |
| 8             | -0.434059 | -0.678558 | -0.278259 |
| 1             | 0.042804  | 0.922998  | -1.498244 |
| 6             | 1.767662  | 0.199625  | -0.454789 |
| 6             | 2.253510  | -0.718434 | 0.482888  |
| 6             | 2.663705  | 0.881232  | -1.272703 |
| 6             | 3.613411  | -0.956699 | 0.576336  |
| 1             | 1.562148  | -1.255939 | 1.123598  |
| 6             | 4.035396  | 0.647771  | -1.172569 |
| 1             | 2.292876  | 1.595226  | -2.000007 |
| 6             | 4.515623  | -0.272399 | -0.254852 |
| 1             | 4.739250  | 1.169252  | -1.809506 |
| 8             | 0.649506  | 2.757712  | 0.379242  |
| 1             | 1.583366  | 2.534572  | 0.464069  |
| 8             | -4.460677 | 1.855565  | 0.466976  |
| 1             | -3.856849 | 2.604057  | 0.485525  |
| 8             | -4.603538 | -2.800249 | -0.421115 |
| 1             | -5.545730 | -2.628611 | -0.329347 |
| 8             | 5.845028  | -0.516469 | -0.157965 |
| 1             | 5.971337  | -1.190160 | 0.522014  |
| 8             | 4.190683  | -1.834443 | 1.442629  |
| 1             | 3.520139  | -2.265937 | 1.980028  |
| 1             | -1.899049 | 2.434592  | 1.295026  |

## M10- Structure

$\omega$ B97x-D/6-31G(d,p)-PCM-Acetone fully optimized XYZ coordinates

| Atomic Number | X         | Y         | Z         |
|---------------|-----------|-----------|-----------|
| 6             | 0.306903  | 0.554857  | -0.509561 |
| 6             | -1.777256 | -0.538922 | -0.162321 |
| 6             | -2.398877 | 0.680698  | 0.111339  |
| 6             | -1.588617 | 1.930165  | 0.344128  |
| 6             | -0.109003 | 1.602271  | 0.527032  |
| 1             | -1.970068 | -2.643733 | -0.527417 |
| 6             | -2.498486 | -1.721223 | -0.318678 |
| 6             | -3.800008 | 0.682844  | 0.182441  |
| 1             | -1.664449 | 2.622083  | -0.503908 |
| 1             | 0.058972  | 1.159774  | 1.519150  |
| 6             | -4.547318 | -0.478244 | 0.027031  |
| 6             | -3.885083 | -1.680575 | -0.211536 |
| 1             | -5.626835 | -0.444020 | 0.092290  |
| 8             | -0.424099 | -0.649583 | -0.274144 |
| 1             | 0.055029  | 0.941997  | -1.505894 |
| 6             | 1.771638  | 0.219824  | -0.453117 |
| 6             | 2.264373  | -0.588134 | 0.576317  |
| 6             | 2.651986  | 0.743388  | -1.391981 |
| 6             | 3.619426  | -0.859787 | 0.653803  |
| 1             | 1.583708  | -1.012435 | 1.308062  |
| 6             | 4.018109  | 0.477499  | -1.310990 |
| 1             | 2.273098  | 1.368221  | -2.192894 |
| 6             | 4.508330  | -0.321196 | -0.289351 |
| 1             | 4.713077  | 0.881455  | -2.037337 |
| 8             | 0.699770  | 2.738395  | 0.329624  |
| 1             | 0.463239  | 3.386494  | 0.999312  |
| 8             | -4.494964 | 1.824369  | 0.421172  |
| 1             | -3.904665 | 2.583723  | 0.410938  |
| 8             | -4.651246 | -2.791683 | -0.349982 |
| 1             | -4.084069 | -3.551751 | -0.511677 |
| 8             | 5.835399  | -0.588639 | -0.201357 |
| 1             | 5.970705  | -1.142698 | 0.577665  |
| 8             | 4.200216  | -1.644723 | 1.605756  |
| 1             | 3.541980  | -1.937976 | 2.241806  |
| 1             | -1.947020 | 2.462967  | 1.234024  |

## M11- Structure

$\omega$ B97x-D/6-31G(d,p)-PCM-Acetone fully optimized XYZ coordinates

| Atomic Number | X         | Y         | Z         |
|---------------|-----------|-----------|-----------|
| 6             | 0.294574  | 0.519910  | -0.504124 |
| 6             | -1.790759 | -0.544144 | -0.155821 |
| 6             | -2.388602 | 0.684164  | 0.134206  |
| 6             | -1.563935 | 1.921197  | 0.388837  |
| 6             | -0.093504 | 1.572684  | 0.546544  |
| 1             | -2.021931 | -2.637257 | -0.558490 |
| 6             | -2.534017 | -1.709370 | -0.333881 |
| 6             | -3.789873 | 0.711387  | 0.200837  |
| 1             | -1.642726 | 2.631770  | -0.443502 |
| 1             | 0.083951  | 1.122424  | 1.533653  |
| 6             | -4.558791 | -0.432716 | 0.025645  |
| 6             | -3.920237 | -1.643434 | -0.232779 |
| 1             | -5.637456 | -0.377578 | 0.088600  |
| 8             | -0.438444 | -0.679070 | -0.268121 |
| 1             | 0.035873  | 0.918391  | -1.494084 |
| 6             | 1.763261  | 0.200185  | -0.451893 |
| 6             | 2.252602  | -0.715855 | 0.485892  |

|   |           |           |           |
|---|-----------|-----------|-----------|
| 6 | 2.656364  | 0.881776  | -1.273166 |
| 6 | 3.613121  | -0.952253 | 0.576133  |
| 1 | 1.563631  | -1.253142 | 1.129358  |
| 6 | 4.028541  | 0.650242  | -1.176256 |
| 1 | 2.282784  | 1.594421  | -2.000397 |
| 6 | 4.512287  | -0.267987 | -0.258380 |
| 1 | 4.730139  | 1.171698  | -1.815707 |
| 8 | 0.645436  | 2.758699  | 0.379268  |
| 1 | 1.578907  | 2.535823  | 0.468073  |
| 8 | -4.464724 | 1.861883  | 0.452194  |
| 1 | -3.857154 | 2.606850  | 0.479231  |
| 8 | -4.708092 | -2.735941 | -0.395642 |
| 1 | -4.156080 | -3.503993 | -0.571075 |
| 8 | 5.842255  | -0.510091 | -0.164616 |
| 1 | 5.971335  | -1.182254 | 0.516334  |
| 8 | 4.193781  | -1.828253 | 1.441915  |
| 1 | 3.525590  | -2.257567 | 1.983988  |
| 1 | -1.904758 | 2.437878  | 1.293259  |

## M12- Structure

$\omega$ B97x-D/6-31G(d,p)-PCM-Acetone fully optimized XYZ coordinates

| Atomic Number |   |   | X         | Y         | Z         |
|---------------|---|---|-----------|-----------|-----------|
| 1             | 6 | 0 | 0.307152  | 0.508728  | -0.531004 |
| 2             | 6 | 0 | -1.786299 | -0.551667 | -0.141481 |
| 3             | 6 | 0 | -2.395581 | 0.683616  | 0.086604  |
| 4             | 6 | 0 | -1.572772 | 1.932642  | 0.274300  |
| 5             | 6 | 0 | -0.096118 | 1.597191  | 0.467240  |
| 6             | 1 | 0 | -2.001330 | -2.666283 | -0.431145 |
| 7             | 6 | 0 | -2.519933 | -1.731100 | -0.257084 |
| 8             | 6 | 0 | -3.796635 | 0.702942  | 0.155996  |
| 9             | 1 | 0 | -1.643067 | 2.594766  | -0.597524 |
| 10            | 1 | 0 | 0.068346  | 1.189963  | 1.474944  |
| 11            | 6 | 0 | -4.556011 | -0.454994 | 0.040428  |
| 12            | 6 | 0 | -3.906203 | -1.671888 | -0.153960 |
| 13            | 1 | 0 | -5.635103 | -0.406863 | 0.103449  |
| 14            | 8 | 0 | -0.434179 | -0.679967 | -0.247472 |
| 15            | 1 | 0 | 0.055160  | 0.858698  | -1.541071 |
| 16            | 6 | 0 | 1.768546  | 0.162496  | -0.467724 |
| 17            | 6 | 0 | 2.296538  | -0.432383 | 0.681998  |
| 18            | 6 | 0 | 2.614984  | 0.466505  | -1.523750 |
| 19            | 6 | 0 | 3.649994  | -0.716222 | 0.779059  |
| 20            | 1 | 0 | 1.638231  | -0.684949 | 1.508370  |
| 21            | 6 | 0 | 3.978440  | 0.188512  | -1.433531 |
| 22            | 1 | 0 | 2.217381  | 0.925330  | -2.421940 |
| 23            | 6 | 0 | 4.505543  | -0.399723 | -0.292036 |
| 24            | 1 | 0 | 4.641030  | 0.427652  | -2.259457 |
| 25            | 8 | 0 | 0.724027  | 2.717315  | 0.228695  |
| 26            | 1 | 0 | 0.496063  | 3.390334  | 0.876356  |
| 27            | 8 | 0 | -4.479837 | 1.859448  | 0.352927  |
| 28            | 1 | 0 | -3.880756 | 2.611189  | 0.319261  |
| 29            | 8 | 0 | -4.684273 | -2.778898 | -0.253819 |
| 30            | 1 | 0 | -4.125351 | -3.551078 | -0.383455 |
| 31            | 8 | 0 | 5.820886  | -0.699674 | -0.137928 |
| 32            | 1 | 0 | 6.298246  | -0.436323 | -0.930691 |
| 33            | 8 | 0 | 4.217153  | -1.295143 | 1.869514  |
| 34            | 1 | 0 | 3.535746  | -1.445379 | 2.532222  |
| 35            | 1 | 0 | -1.924677 | 2.500357  | 1.145018  |

## M13- Structure

$\omega$ B97x-D/6-31G(d,p)-PCM-Acetone fully optimized XYZ coordinates

| Atomic Number |   |   | X         | Y         | Z         |
|---------------|---|---|-----------|-----------|-----------|
| 1             | 6 | 0 | 0.296258  | 0.502248  | -0.521117 |
| 2             | 6 | 0 | -1.798284 | -0.555898 | -0.129595 |
| 3             | 6 | 0 | -2.409135 | 0.680979  | 0.085016  |
| 4             | 6 | 0 | -1.587777 | 1.932133  | 0.264558  |
| 5             | 6 | 0 | -0.111504 | 1.599437  | 0.465905  |
| 6             | 1 | 0 | -2.010550 | -2.673396 | -0.399862 |
| 7             | 6 | 0 | -2.530449 | -1.737012 | -0.236321 |
| 8             | 6 | 0 | -3.810502 | 0.699930  | 0.148770  |
| 9             | 1 | 0 | -1.655052 | 2.586443  | -0.613441 |
| 10            | 1 | 0 | 0.049392  | 1.201420  | 1.477882  |
| 11            | 6 | 0 | -4.568541 | -0.459731 | 0.041626  |
| 12            | 6 | 0 | -3.917144 | -1.677986 | -0.138422 |
| 13            | 1 | 0 | -5.647947 | -0.411825 | 0.099698  |
| 14            | 8 | 0 | -0.445655 | -0.684118 | -0.229675 |
| 15            | 1 | 0 | 0.048121  | 0.843284  | -1.535124 |
| 16            | 6 | 0 | 1.757369  | 0.156139  | -0.449015 |
| 17            | 6 | 0 | 2.277902  | -0.428696 | 0.709982  |
| 18            | 6 | 0 | 2.608083  | 0.449788  | -1.506992 |
| 19            | 6 | 0 | 3.630639  | -0.705833 | 0.797944  |
| 20            | 1 | 0 | 1.620191  | -0.675367 | 1.538005  |
| 21            | 6 | 0 | 3.972775  | 0.176711  | -1.418915 |
| 22            | 1 | 0 | 2.207654  | 0.899602  | -2.408630 |
| 23            | 6 | 0 | 4.490359  | -0.398932 | -0.269206 |
| 24            | 1 | 0 | 4.645698  | 0.404247  | -2.236938 |
| 25            | 8 | 0 | 0.708610  | 2.717917  | 0.220258  |
| 26            | 1 | 0 | 0.477203  | 3.397062  | 0.860308  |
| 27            | 8 | 0 | -4.495365 | 1.857695  | 0.331777  |
| 28            | 1 | 0 | -3.897225 | 2.609874  | 0.290340  |
| 29            | 8 | 0 | -4.693809 | -2.786719 | -0.229686 |
| 30            | 1 | 0 | -4.133618 | -3.559216 | -0.352316 |
| 31            | 8 | 0 | 5.815908  | -0.670439 | -0.171817 |
| 32            | 1 | 0 | 6.232893  | -0.394077 | -0.997549 |
| 33            | 8 | 0 | 4.238442  | -1.279217 | 1.875361  |
| 34            | 1 | 0 | 5.181353  | -1.375958 | 1.713693  |
| 35            | 1 | 0 | -1.943447 | 2.507269  | 1.128870  |
